# Supplementary material for: Influence of molecular weight on the aggregation-induced emission enhancement and spectral stability of vinyl polymers containing the fluorescent 2,4,6-triphenylpyridine pendant groups
Source: Royal Society of Chemistry journal article supplement (doi:10.1039/c2jm30455d), 2012-01-01
Supplement: c2jm30455d.pdf [file c2jm30455d.pdf]

*Electronic Supplementary Information (ESI) for*

**Influence of Molecular Weight on the Aggregation-Induced Emission  
Enhancement and Spectral Stability of Vinyl Polymers Containing  
the Fluorescent 2,4,6-Triphenylpyridine Pendant Groups**

Chung Tin Lai<sup>a</sup> and Jin Long Hong<sup>\*a</sup>

<sup>a</sup> *Department of Materials and Optoelectronic Science, National Sun Yat-Sen  
University, Kaohsiung 80424, Taiwan, Republic of China*

\* To whom correspondence should be addressed. E-mail: [jlhong@mail.nsysu.edu.tw](mailto:jlhong@mail.nsysu.edu.tw).

---

\* Correspondence to: Jin-Long Hong, Department of Materials and Optoelectronic Science, National Sun Yat-Sen University, Kaohsiung, 80424 Taiwan  
E-mail: [jlhong@mail.nsysu.edu.tw](mailto:jlhong@mail.nsysu.edu.tw)  
Tel: +886-7-5252000ext4065

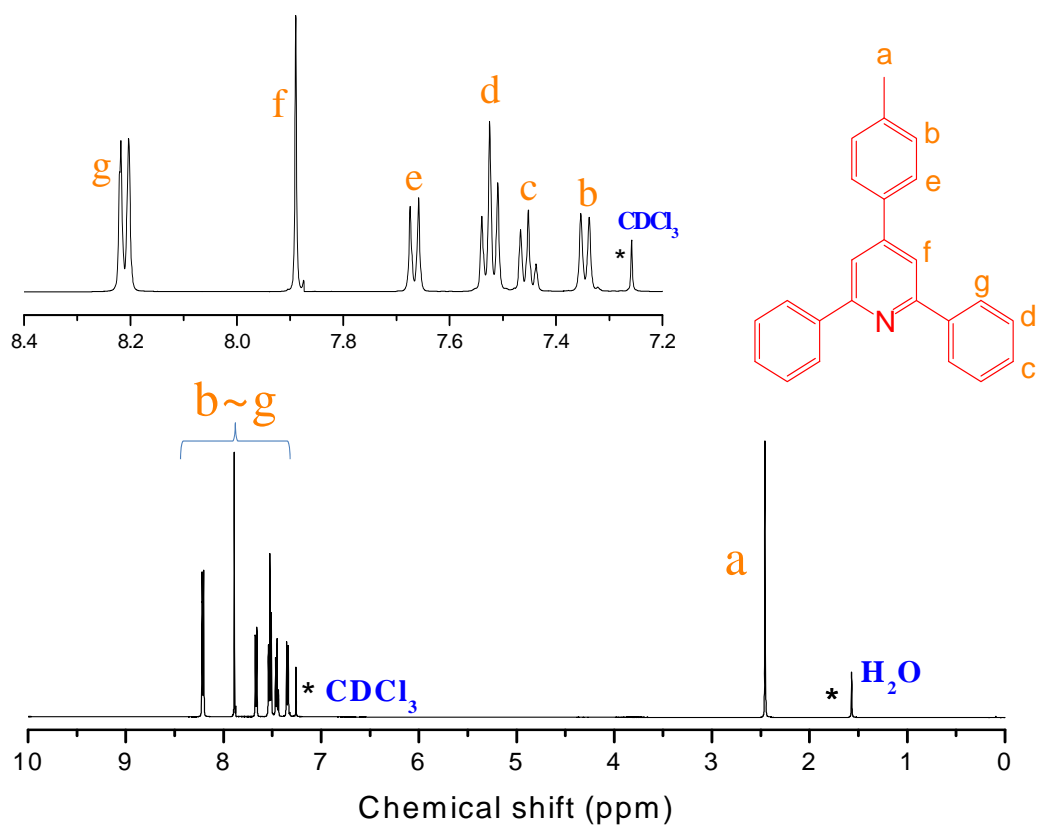

**Fig. S1.**  $^1\text{H}$  NMR spectrum of DTP ( $\text{CDCl}_3$ ).

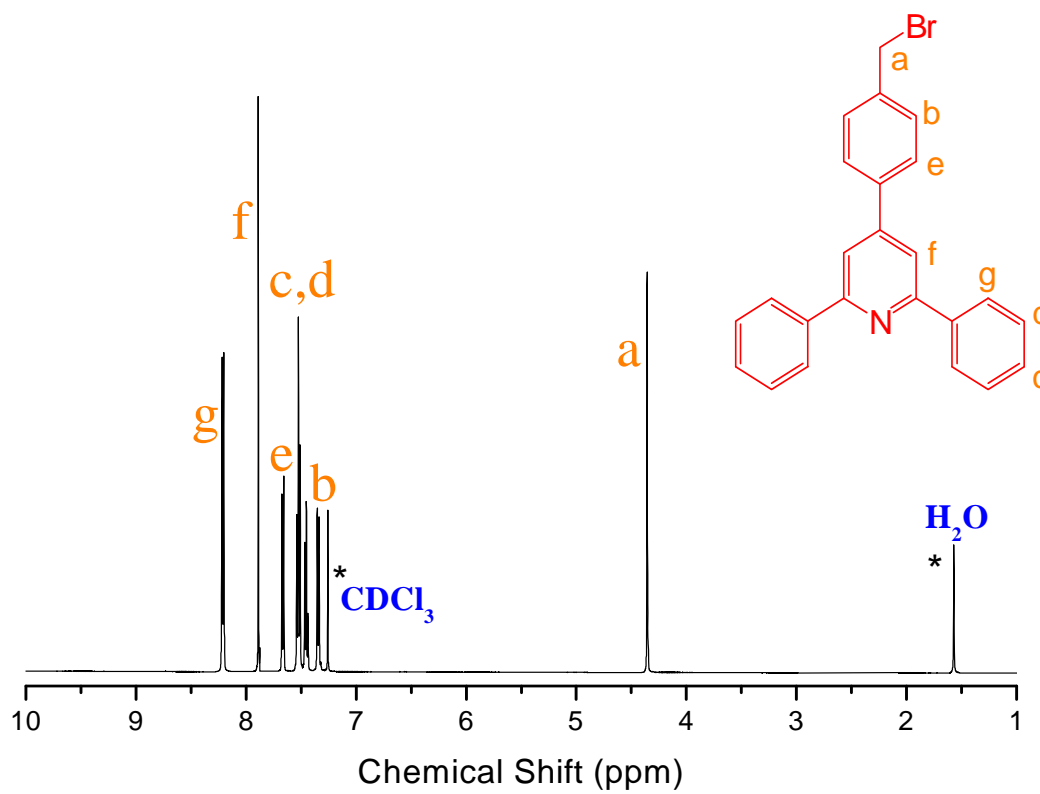

**Fig. S2.**  $^1\text{H}$  NMR spectrum of BPDP ( $\text{CDCl}_3$ ).

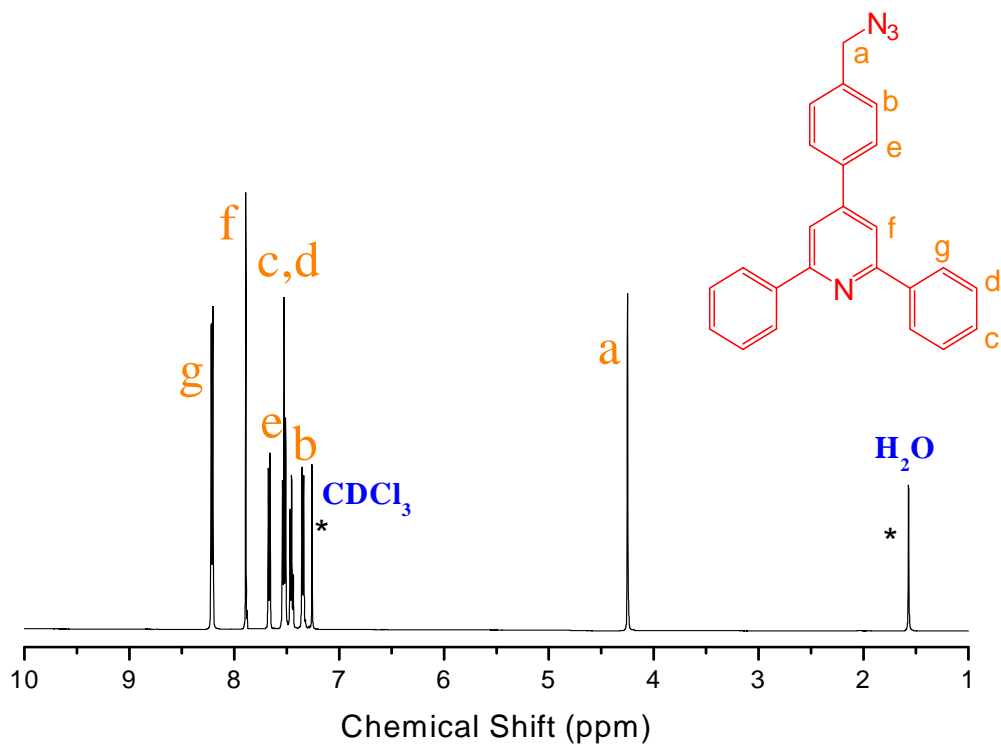

**Fig. S3.**  $^1\text{H}$  NMR spectrum of APDP ( $\text{CDCl}_3$ ).

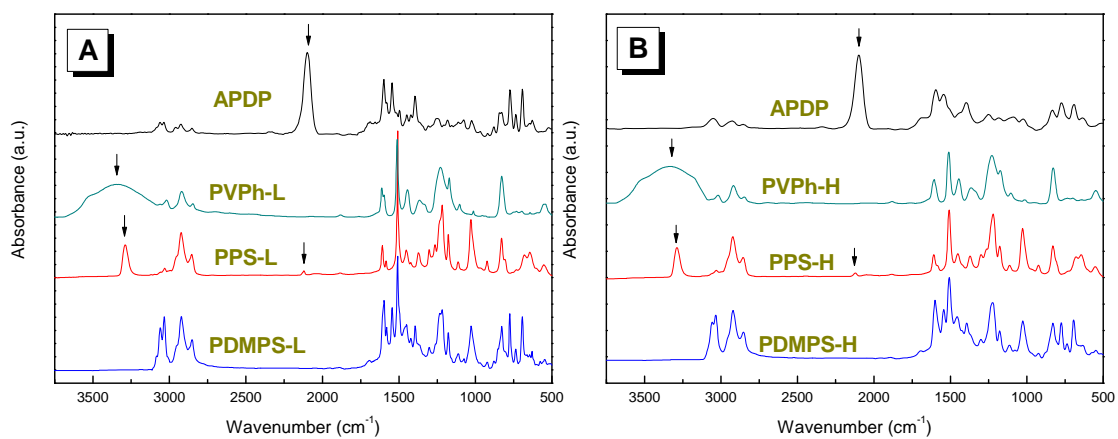

**Fig. S4.** FT-IR spectra of APDP, PVPh, PPS and PDMPS samples of the low (left) and the high (right) Mw analogues. .

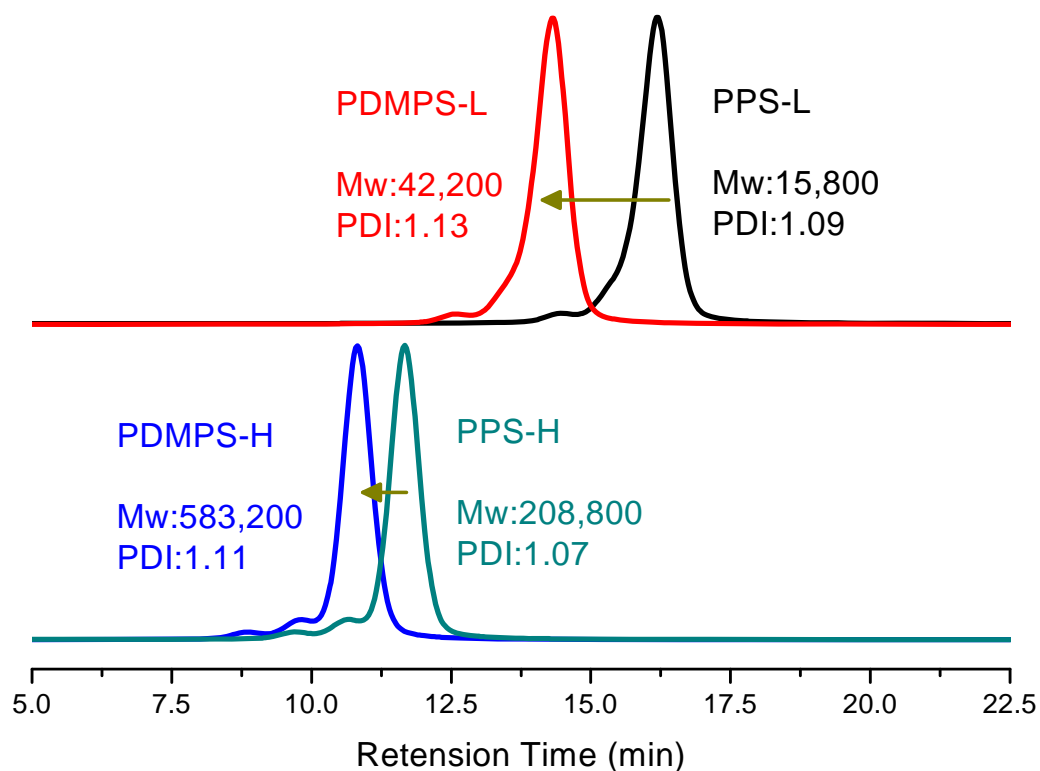

**Fig. S5.** GPC elution curves of high and low M<sub>w</sub> PPS and PDMP-S (eluent: THF; elution rate: 0.6 mL/min).

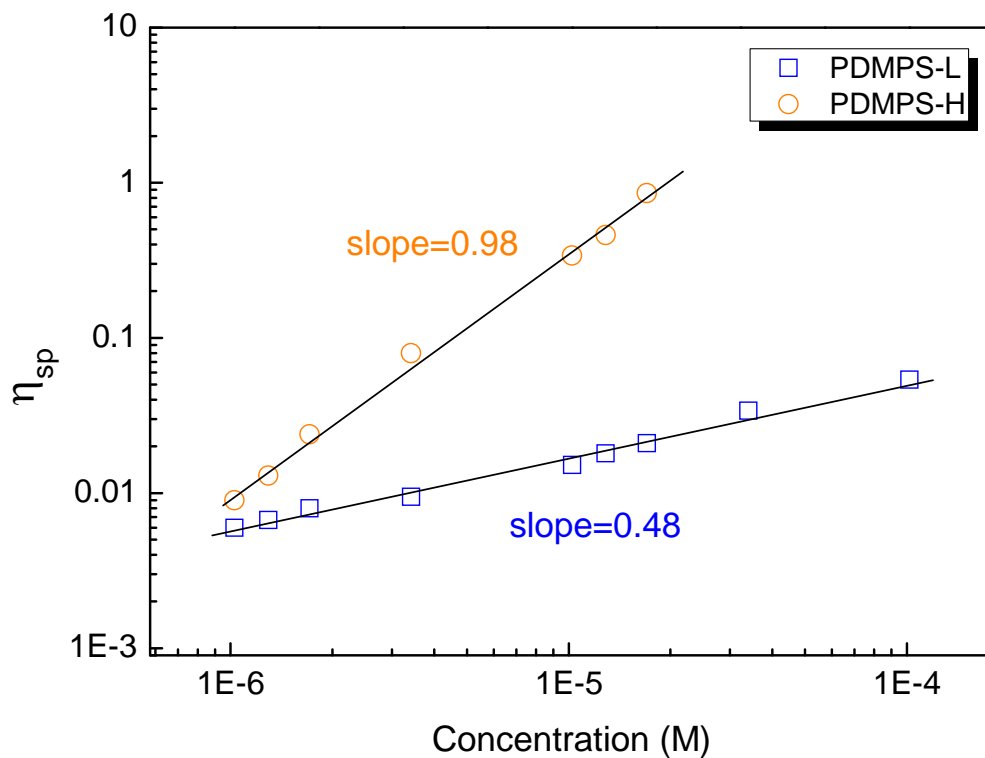

**Fig. S6.** Specific viscosity ( $\eta_{sp}$ ) of PDMP-S-L and -H with different concentrations in THF.

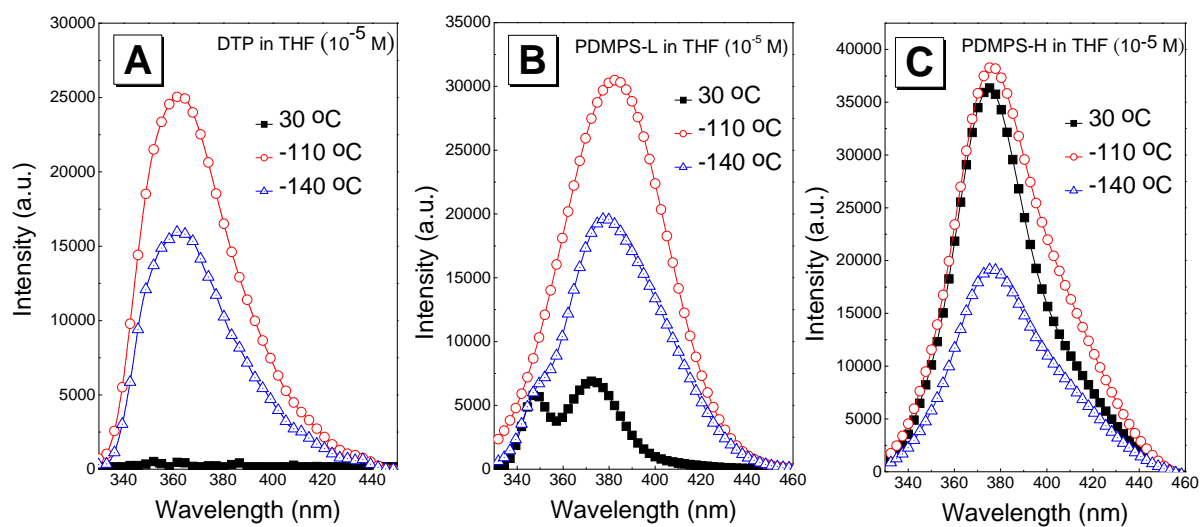

**Fig. S7.** Solution ( $10^{-5}$  M) emission spectra of A) DTP, B) PDMPS-L and C) PDMPS-H in THF at reduced temperatures.

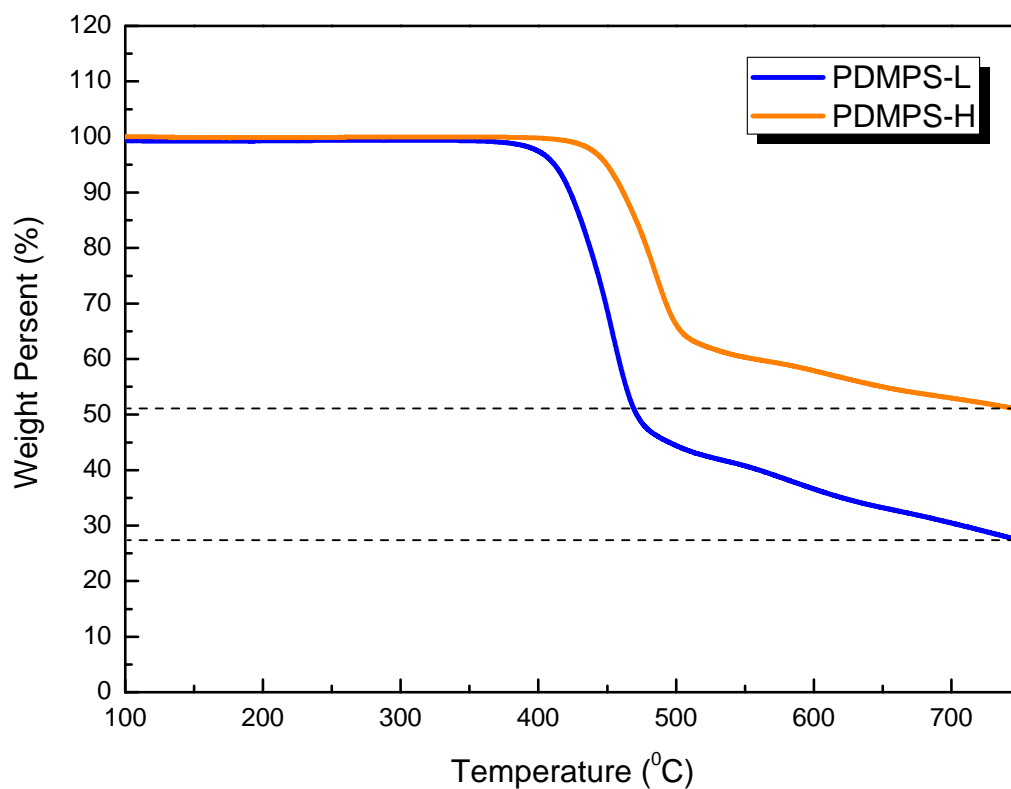

**Fig. S8.** TGA thermograms of PDMPS-L and -H (heating rate of 20  $^{\circ}$ C/min).

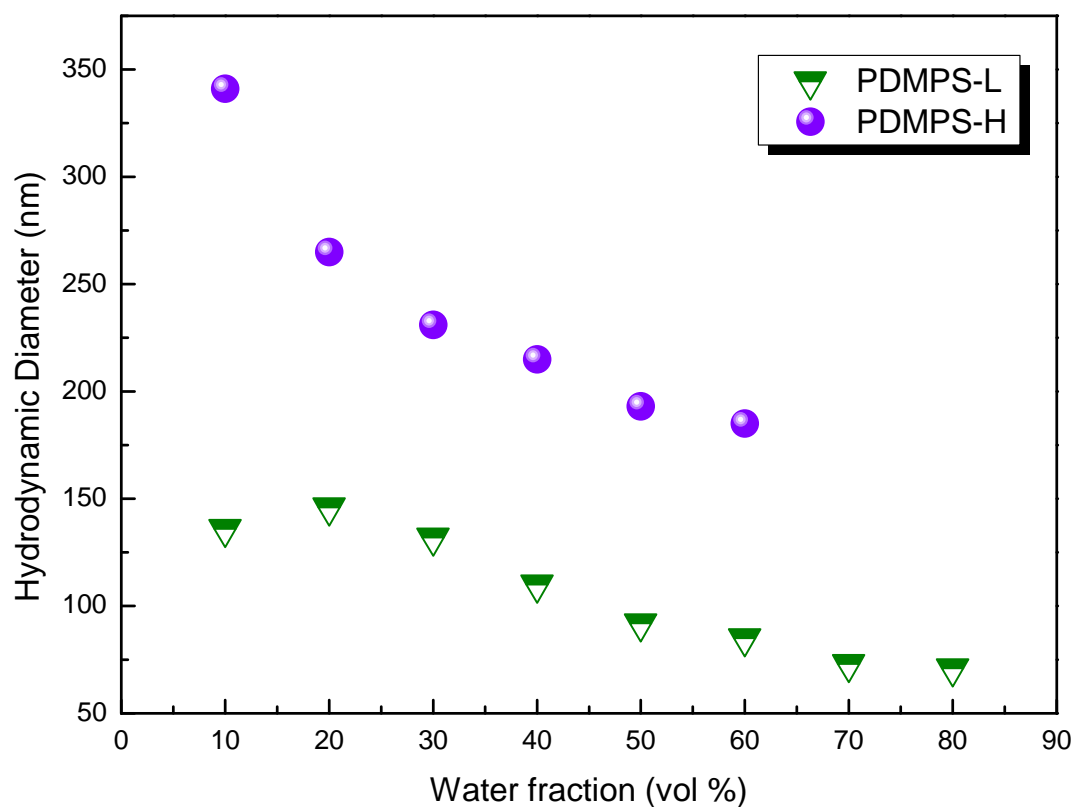

**Fig. S9.** Average hydrodynamic diameter ( $D_h$ ) for the dilute ( $10^{-5}$  M) solutions of PDMPS-L and -H in THF/water solvent mixtures of varied compositions.

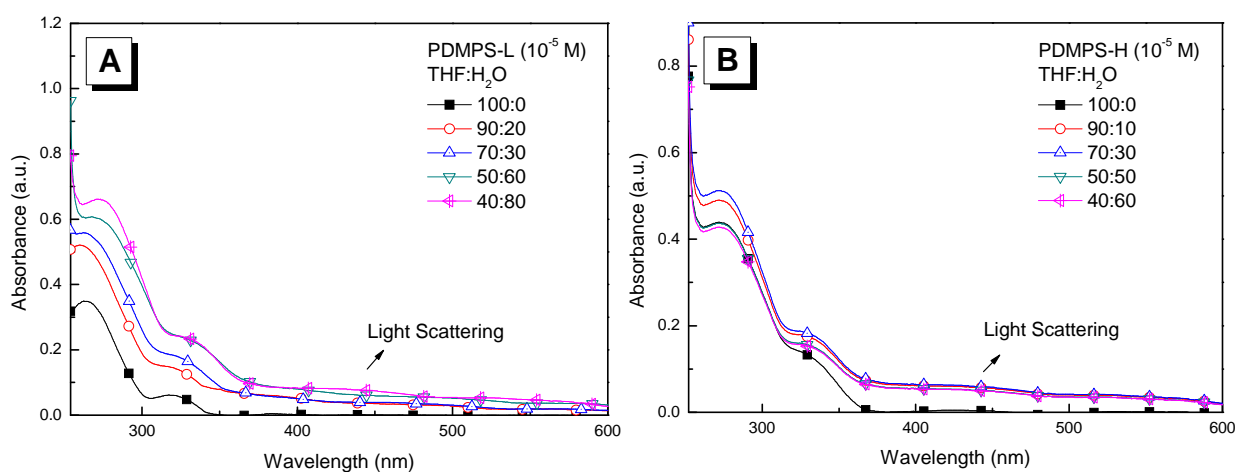

**Fig. S10.** Solution UV-vis absorption spectra of (A) PDMPS- and (B) PDMPS- ( $10^{-5}$  M) in THF/water mixtures with varied compositions.
